# Supplementary material
Source: PubMed Central journal article supplement (PMC8643344)
Supplement: NIHMS1748623-supplement-2.pdf [file NIHMS1748623-supplement-2.pdf]

**Supplemental Table 1. IC50 of Y3-treated ovarian cancer cell lines and fallopian tube cell lines.**

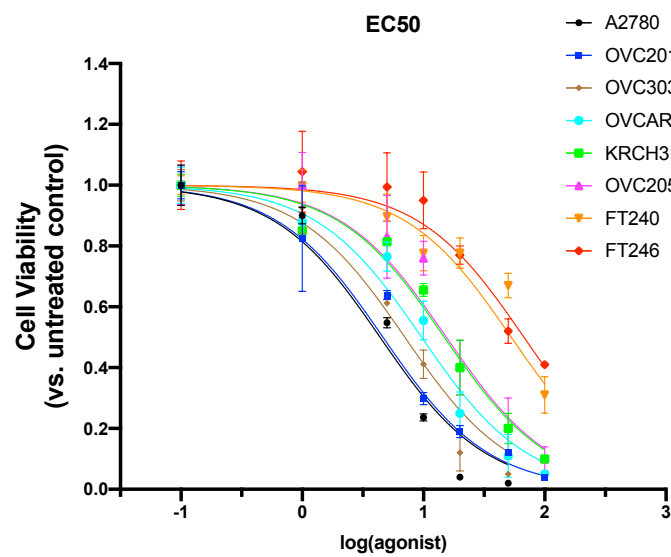

| Cell line | A2780 | OVC201 | OVC303 | OVCAR8 | KRCH31 | OVC205 | FT240 | FT246 |
|-----------|-------|--------|--------|--------|--------|--------|-------|-------|
| IC50 (μM) | 4.379 | 4.632  | 7.014  | 9.643  | 14.84  | 15.44  | 52.93 | 67.33 |

**Supplemental Table 2. Top pathways altered by Y3 treatment in A2780 cels.**

| Pathways               | Predicted Activation State | Activation z-score | p-value  | Top differentially expressed genes in identified pathway                                                                                       |
|------------------------|----------------------------|--------------------|----------|------------------------------------------------------------------------------------------------------------------------------------------------|
| ATF4 signaling         | Activated                  | 2.232              | 6.72E-09 | ASNS,ATF3,CHAC1,DDIT3,DDIT4,FGF21,PCK2,STC2,TRIB3,WARS                                                                                         |
| ER stress response     | Activated                  | 2.275              | 2.17E-08 | ASNS,ATF3,CHAC1,DDIT3,DDIT4,FGF21,GPT2,PCK2,PCNA,SLC7A11,WARS                                                                                  |
| PI3K pathway           | Inhibited                  | -0.085             | 6.82E-06 | ACSM3,ATF3,CDR1,DDIT3,DUSP6,FEN1,HGF,INPP4B,MYB,MYEF2,NANOG,PCNA,PLK2                                                                          |
| Estrogen signaling     | Inhibited                  | -0.224             | 2.49E-05 | ACSM3,ATF3,CCNE2,CDC42BPA,CDR1,DDIT3,DDIT4,DUSP6,FEN1,H6PD,HBP1,HGF,HUNK,INPP4B,MYB,MYOF,PCNA,PDCD4,PLK2,PTBP2,SEMA3A,STC2,TMEM2,TSC22D3,WNT5B |
| TGFB1 pathway          | Inhibited                  | -0.521             | 6.36E-05 | ACSM3,ASNS,C5AR1,CALCOCO2,CCNE2,DDIT3,DFNA5,FGF21,H6PD,HGF,MYB,MYOF,OPN3,PCNA,PDCD4,PLK2,RGCC,SEMA3A,STC2,TSC22D3,TTC28,UST,WNT5B              |
| HGF pathway            | Activated                  | 0.310              | 1.34E-04 | ASNS,ATF3,CALCRL,CCNE2,DDIT3,DUSP6,FEN1,HGF,NANOG,PCNA,RPS6KA5,SEMA3A                                                                          |
| PPARG pathway          | Activated                  | 1.118              | 3.17E-04 | ASAP1,CCPG1,H6PD,HGF,LNPEP,PCK2,PCNA,TRIB3,TSC22D3,VLDLR                                                                                       |
| ESR1 pathway           | Inhibited                  | -2.968             | 4.40E-04 | ARHGEF2,ATF3,CCPG1,CDC42BPA,COG6,DDIT4,MAP1B,MYB,OPHN1,PCM1,PCNA,PDCD4,SLC7A11,STC2,TMEM2,TRIB3,TSC22D3,WARS                                   |
| TP53 pathway           | Activated                  | 0.143              | 4.42E-04 | AKT3,ARHGEF2,ASNS,ATF3,CCNE2,CDC42BPA,DDIT3,DDIT4,DUSP6,FEN1,MTMR11,MYOF,NANOG,PCNA,PLK2,TRIB3,TSC22D3,TTC28,WNT5B                             |
| TP63 pathway           | Inhibited                  | -0.249             | 1.22E-03 | DDIT4,DUSP6,FGF21,HBP1,MYB,NANOG,PCNA,SLC7A11                                                                                                  |
| IL2 pathway            | Inhibited                  | -1.179             | 1.47E-03 | CCNE2,DUSP6,MYB,PCNA,PDCD4,RGCC,RPS6KA5,SES3,STC2,TRIB3                                                                                        |
| FGF pathway            | Activated                  | 2.000              | 2.90E-03 | AKT3,FGF21,HGF,RPS6KA5                                                                                                                         |
| ErbB/HER2              | Inhibited                  | -2.449             | 4.08E-03 | CCNE2,DDIT3,DUSP6,FEN1,H6PD,MAP1B,PCK2,PCNA,PDCD4,WNT5B                                                                                        |
| HNF4A signaling        | Activated                  | NA                 | 5.83E-03 | AGTPBP1,CCNE2,DUSP6,DYRK1B,FAHD2A,FEN1,GINS2,HBP1,HUNK,INHBE,LRIG2,MRPS12,OTUD6B,PCK2,PCNA,PDCD4,RBKS,RPS6KA5,SLC25A19,SLC43A1,TUBE1           |
| RB1 pathway            | Activated                  | 1.969              | 6.34E-03 | CCNE2,DDIT3,FEN1,GPT2,HUNK,MYB,PCNA                                                                                                            |
| Progesterone signaling | Inhibited                  | -0.388             | 7.23E-03 | ATF3,C5AR1,DDIT3,HGF,HUNK,MYB,PCNA,PLK2,WNT5B                                                                                                  |
| MYC pathway            | Activated                  | 0.388              | 7.65E-03 | ASNS,CCNE2,DDIT3,DDIT4,DUSP6,EZH1,FAM129A,IMPACT,NANOG,PCNA,PDCD4,SLC25A19,VLDLR                                                               |
| EGF pathway            | Inhibited                  | -1.029             | 8.10E-03 | ARHGEF2,ATF3,DDIT3,DUSP6,EZH1,HGF,PCNA,PDCD4                                                                                                   |
| IFNG pathway           | Activated                  | 0.481              | 1.54E-02 | ASNS,ATF3,C5AR1,CALCOCO2,CHAC1,DDIT3,H6PD,OPN3,PSMB10,SLC7A11,TSC22D3,TTC28,VLDLR,WARS                                                         |
| VEGF signaling         | Inhibited                  | -0.934             | 2.46E-02 | ASNS,CALCRL,ATF3,DUSP6,RGCC,CCNE2,DDIT3                                                                                                        |

Supplemental Table 3 Y3-treated A2780 vs. untreated A2780 cells, fold&gt;2 or &lt;-2, p&lt;0.05, differently expressed genes.

| Transcript Cluster ID       | Gene Symbol | Fold change | Transcript Cluster ID       | Gene Symbol | Fold change |
|-----------------------------|-------------|-------------|-----------------------------|-------------|-------------|
| TC0100016678.hg.1           | FAM129A     | 7.26        | TC1000008904.hg.1           | PDCD4       | 2.16        |
| TC0400011920.hg.1           | SLC7A11     | 6.85        | TC0500007738.hg.1           | MAP1B       | 2.15        |
| TC0900006481.hg.1           | VLDLR       | 6.26        | TC1200012761.hg.1           | TAS2R31     | 2.15        |
| TC0500009488.hg.1           | CREBRF      | 4.29        | TC0200008469.hg.1           | FAHD2A      | 2.13        |
| TC1500010723.hg.1           | CHAC1       | 4.18        | TC0300007435.hg.1           | DOCK3       | 2.13        |
| TC0100015234.hg.1           | SLC16A4     | 4.08        | TC1300006930.hg.1           | COG6        | 2.13        |
| TC1000007990.hg.1           | DDIT4       | 3.94        | TC2000008295.hg.1           | GPCPD1      | 2.13        |
| TC0400011994.hg.1           | INPP4B      | 3.35        | TC0200009933.hg.1           | ERICH2      | 2.12        |
| TC0700010501.hg.1           | DFNA5       | 3.24        | TC0800008198.hg.1           | OTUD6B      | 2.12        |
| TC0200010253.hg.1           | ANKAR       | 3.21        | TC1500008635.hg.1           | POTEB2      | 2.12        |
| TC0900012209.hg.1           | TTC39B      | 3.18        | TC0100018507.hg.1           | ARHGEF2     | 2.11        |
| TC0700011876.hg.1           | ASNS        | 3.13        | TC0200016710.hg.1           | ANKRD36C    | 2.11        |
| TC0100014203.hg.1           | ZCCHC11     | 3.12        | TC1300009332.hg.1           | RBM26       | 2.11        |
| TC0200008536.hg.1           | ANKRD36     | 3.08        | TC0100006771.hg.1           | H6PD        | 2.1         |
| TC0100014930.hg.1           | EVI5        | 3.07        | TC0100017984.hg.1           | AKT3        | 2.1         |
| TC1200011770.hg.1           | ALDH1L2     | 3.01        | TC0300010680.hg.1           | CLASP2      | 2.1         |
| TC0500012870.hg.1           | STC2        | 2.94        | TC0600012372.hg.1           | LCA5        | 2.1         |
| TC2000006444.hg.1           | TRIB3       | 2.94        | TC0800011826.hg.1           | ASAP1       | 2.1         |
| TC1200006688.hg.1           | NANOG       | 2.9         | TC2200008364.hg.1           | TTC28       | 2.1         |
| TC0300011009.hg.1           | DDIT3       | 2.89        | TC0200007132.hg.1           | YPEL5       | 2.09        |
| TC0X00009929.hg.1           | OPHN1       | 2.89        | TC0500013246.hg.1           | PCDHB10     | 2.09        |
| TCUn_GL000213v100006434.hg. | LOC1002889  | 2.89        | TC0100015789.hg.1           | POGZ        | 2.08        |
| TC0X00010375.hg.1           | ZMAT1       | 2.87        | TC1000010367.hg.1           | ZNF25       | 2.08        |
| TC0100007958.hg.1           | ZFP69B      | 2.86        | TC2200006517.hg.1           | CECR2       | 2.08        |
| TC0100007784.hg.1           | AGO4        | 2.84        | TC0X00010473.hg.1           | TSC22D3     | 2.07        |
| TC0600012883.hg.1           | TUBE1       | 2.79        | TC1600006870.hg.1           | ATF7IP2     | 2.07        |
| TC1500009336.hg.1           | MYEF2       | 2.79        | TC1600007723.hg.1           | GPT2        | 2.07        |
| TC0100014769.hg.1           | MMesentery  | 2.76        | TC0200008911.hg.1           | ZC3H6       | 2.06        |
| TC1600011362.hg.1           | ACSM3       | 2.74        | TC0200012098.hg.1           | RBKS        | 2.06        |
| TC1200010968.hg.1           | DDIT3       | 2.66        | TC0300007050.hg.1           | C3orf35     | 2.06        |
| TC1600011355.hg.1           | NPIPA1      | 2.64        | TC1600011354.hg.1           | NPIPA2      | 2.06        |
| TC1100012020.hg.1           | SESN3       | 2.58        | TC1500009669.hg.1           | VPS13C      | 2.05        |
| TC1500010869.hg.1           | CCPG1       | 2.56        | TC0200016464.hg.1           | APLF        | 2.04        |
| TC0X00011237.hg.1           | RAB39B      | 2.54        | TC0600008343.hg.1           | BEND6       | 2.04        |
| TC1900008489.hg.1           | FGF21       | 2.52        | TC0600012839.hg.1           | CDK19       | 2.04        |
| TC1100010893.hg.1           | SLC43A1     | 2.51        | TC0300006994.hg.1           | FBXL2       | 2.03        |
| TC0900010388.hg.1           | TMEM2       | 2.49        | TC0900010056.hg.1           | ANKRD18A    | 2.03        |
| TC0100015716.hg.1           | MTMR11      | 2.48        | TC15_KI270727v1_random00006 | POTEB3      | 2.03        |
| TC1700008175.hg.1           | CALCOCO2    | 2.48        | TC1700010738.hg.1           | EZH1        | 2.03        |
| TC1400010195.hg.1           | WARS        | 2.46        | TC1700011465.hg.1           | LRRC37A3    | 2.03        |
| TC1800007316.hg.1           | SKA1        | 2.45        | TC0100008073.hg.1           | KDM4A       | 2.02        |
| TC0200013332.hg.1           | PLGLB1      | 2.44        | TC0100009468.hg.1           | LRIG2       | 2.02        |
| TC0100014652.hg.1           | ZZZ3        | 2.42        | TC0100013602.hg.1           | TMEM234     | 2.02        |
| TC0400010558.hg.1           | ATP8A1      | 2.42        | TC0900007457.hg.1           | CNTNAP3P2   | 2.02        |
| TC0500009010.hg.1           | TCERG1      | 2.42        | TC1400009973.hg.1           | RPS6KA5     | 2.02        |
| TC0700008747.hg.1           | HBP1        | 2.42        | TC1800006912.hg.1           | IMPACT      | 2.02        |
| TC1000011445.hg.1           | MYOF        | 2.4         | TC0400007280.hg.1           | WDR19       | 2.01        |
| TC1200007881.hg.1           | INHBE       | 2.4         | TC0400012972.hg.1           | RNF150      | 2.01        |
| TC1500009460.hg.1           | FAM214A     | 2.4         | TC0500008157.hg.1           | LNPEP       | 2.01        |
| TC0600009364.hg.1           | NCOA7       | 2.39        | TC0100017947.hg.1           | OPN3        | -2.01       |
| TC1500009200.hg.1           | TTBK2       | 2.36        | TC1200011470.hg.1           | DUSP6       | -2.02       |
| TC0100017548.hg.1           | CDC42BPA    | 2.34        | TC1600011553.hg.1           | PSMB10      | -2.02       |
| TC0800006884.hg.1           | PCM1        | 2.34        | TC0400007455.hg.1           | SLC10A4     | -2.05       |
| TC1500008658.hg.1           | POTEB3      | 2.33        | TC2000008279.hg.1           | PCNA        | -2.05       |
| TC1600011184.hg.1           | KLHDC4      | 2.33        | TC1900008036.hg.1           | MRPS12      | -2.08       |
| TC0200015193.hg.1           | CALCRL      | 2.32        | TC2100006909.hg.1           | HUNK        | -2.09       |
| TC1600007030.hg.1           | NPIPA7      | 2.32        | TC1000010439.hg.1           | HNRNPF      | -2.11       |
| TC0900010607.hg.1           | AGTPBP1     | 2.31        | TC1200006469.hg.1           | WNT5B       | -2.11       |
| TC1400006715.hg.1           | PCK2        | 2.31        | TC0100011871.hg.1           | HIST3H2BB   | -2.12       |
| TC0800010417.hg.1           | PCMTD1      | 2.3         | TC0500010835.hg.1           | PLK2        | -2.2        |
| TC1500006495.hg.1           | OR4N4       | 2.3         | TC1600011574.hg.1           | GINS2       | -2.21       |
| TC1800008189.hg.1           | POTEC       | 2.3         | TC1700011746.hg.1           | SLC25A19    | -2.21       |
| TC0100008033.hg.1           | ERMAP       | 2.29        | TC1000008193.hg.1           | PPIF        | -2.23       |
| TC0200010966.hg.1           | RHBDD1      | 2.28        | TC0600009534.hg.1           | MYB         | -2.28       |
| TC0700012798.hg.1           | KDM7A       | 2.26        | TC1700009592.hg.1           | MED31       | -2.28       |
| TC1200012831.hg.1           | DEPDC4      | 2.26        | TC1300006979.hg.1           | RGCC        | -2.29       |
| TSUnmapped00000341.hg.1     | ZNF780A     | 2.26        | TC0200007047.hg.1           | DPYSL5      | -2.36       |
| TC0200016747.hg.1           | TTC21B      | 2.23        | TC1500010946.hg.1           | TM2D3       | -2.42       |
| TC1600011353.hg.1           | NPIPA3      | 2.23        | TC1100013021.hg.1           | FEN1        | -2.7        |
| TC1600009524.hg.1           | NPIPA5      | 2.22        | TC0800011148.hg.1           | CCNE2       | -2.79       |
| TC2100006554.hg.1           | POTED       | 2.22        |                             |             |             |
| TC0700013579.hg.1           | SEMA3A      | 2.21        |                             |             |             |
| TSUnmapped00000019.hg.1     | DYRK1B      | 2.21        |                             |             |             |
| TC0700011643.hg.1           | HGF         | 2.2         |                             |             |             |
| TC0X00010982.hg.1           | CDR1        | 2.2         |                             |             |             |
| TC0100011533.hg.1           | ATF3        | 2.19        |                             |             |             |
| TC0600009783.hg.1           | UST         | 2.19        |                             |             |             |
| TC0100013303.hg.1           | HMGCL       | 2.18        |                             |             |             |
| TC1900011770.hg.1           | C5AR1       | 2.18        |                             |             |             |
| TC0100009149.hg.1           | PTBP2       | 2.17        |                             |             |             |
| TC0900009417.hg.1           | RFX3        | 2.17        |                             |             |             |

**Supplemental Table 4. ID8 mouse model tumor locations**

|            | Tumor locations                                                                                            |
|------------|------------------------------------------------------------------------------------------------------------|
| Control#1  | pancreas+peritoneum+right kidney+stomach+intestines+mesentery(45 lesions)+spleen+diaphragm+right ovary+fat |
| Control#2  | stomach+liver+intestines+mesentery(21 lesions)+diaphragm                                                   |
| Control#3  | peritoneum+right kidney+intestines+mesentery(37 lesions)+2uterus+diaphragm+right ovary+fat                 |
| Control#4  | pancreas+liver+peritoneum+spleen+diaphragm                                                                 |
| Control#5  | pancreas+peritoneum+right kidney+stomach+intestines+mesentery(52 lesions)+spleen+diaphragm+right ovary     |
| Control#6  | pancreas+peritoneum+right kidney+intestines+mesentery(39 lesions)+spleen+2uterus+diaphragm+right ovary     |
| Control#7  | peritoneum+2 kidney+liver+intestines+mesentery(25 lesions)+spleen+diaphragm+left ovary                     |
| Control#8  | pancreas+peritoneum+right kidney+intestines+mesentery(40 lesions)+diaphragm+ left ovary                    |
| Control#9  | peritoneum+right kidney+stomach+intestines(26 lesions)+diaphragm+right ovary                               |
| Control#10 | pancreas+peritoneum+right kidney+intestines+mesentery(43 lesions)+diaphragm+2 ovary+fat                    |
| Y3#1       | peritoneum+intestines+mesentery(15 lesions)+liver+diaphragm+fat                                            |
| Y3#2       | peritoneum+intestines+mesentery(4 lesions)+diaphragm                                                       |
| Y3#3       | pancreas+peritoneum+right kidney+intestines+mesentery+spleen+fat+diaphragm                                 |
| Y3#4       | peritoneum+right kidney+FAT+intestines+mesentery(3 lesions)+diaphragm                                      |
| Y3#5       | peritoneum+right kidney+intestines+Intestines+mesentery(9 lesions)+diaphragm                               |
| Y3#6       | Pancreas+peritoneum+right kidney+fat+diaphragm                                                             |
| Y3#7       | pancreas+peritoneum+left kidney(hydronephrosis)+mesentery(20 lesions)+diaphragm                            |
| Y3#8       | peritoneum+right kidney+intestines+mesentery(30 lesions)+diaphragm                                         |
| Y3#9       | pancreas+peritoneum+right kidney+uterus+diaphragm                                                          |
| Y3#10      | Pancreas+peritoneum+right kidney+intestines(1 lesion)+fat+diaphragm+right ovary                            |
